# Supplementary material for: Exploring the Impact of Generative AI for Sustainable Design Education: Developing and Evaluating an AI-Assisted Pedagogical Model
Source: Research Square preprint supplement (doi:10.21203/rs.3.rs-7438931/v1), 2025-09-15
Supplement: Supplementary file 4 [file Table S4 Assessment of AI-assisted Energy Consideration.xlsx]

## Sheet: Sheet1
Demographical Characteristics				Perceived Usefulness (PU)			Perceived Ease of Use (PEOU)
Index	Name	Gender	Groups	PU1	PU2	PU3	PEUO1	PEOU2	PEOU3
1	xxx	Male	1	4	4	3	4	3	4
2	xxx	Male	1	4	4	3	5	5	5
3	xxx	Male	1	4	4	4	4	3	5
4	xxx	Female	2	5	4	5	5	4	5
5	xxx	Female	2	4	4	3	4	4	3
6	xxx	Female	2	4	4	4	5	2	4
7	xxx	Female	3	4	4	4	4	5	4
8	xxx	Female	3	4	4	4	5	4	4
9	xxx	Female	3	5	4	4	5	4	3
10	xxx	Female	4	4	4	4	4	5	5
11	xxx	Female	4	4	4	4	3	4	3
12	xxx	Male	4	4	5	5	5	4	5
13	xxx	Male	5	4	4	4	4	5	4
14	xxx	Male	5	4	4	4	3	4	3
15	xxx	Male	5	4	4	5	4	3	4
16	xxx	Female	6	4	3	3	4	4	4
17	xxx	Male	6	4	4	4	4	5	4
18	xxx	Female	6	4	3	2	4	4	3
19	xxx	Male	7	3	4	4	4	4	4
20	xxx	Female	7	3	4	4	4	4	3
21	xxx	Female	7	3	4	4	4	3	3
22	xxx	Female	8	4	4	4	5	4	4
23	xxx	Female	8	4	3	3	4	4	4
24	xxx	Female	8	5	5	5	5	4	3
