# Supplementary material for: Exploring the Impact of Generative AI for Sustainable Design Education: Developing and Evaluating an AI-Assisted Pedagogical Model
Source: Research Square preprint supplement (doi:10.21203/rs.3.rs-7438931/v1), 2025-09-15
Supplement: Supplementary file 8 [file Table S8 Course Evaluation.xlsx]

## Sheet: Sheet1
Demographical Characteristics				Perceived Usefulness (PU)
Index	Name	Gender	Groups	Q1	Q2	Q3	Q4
1	xxx	Male	1	4	5	4	4
2	xxx	Male	1	4	5	4	5
3	xxx	Male	1	2	3	3	3
4	xxx	Female	2	5	4	5	4
5	xxx	Female	2	5	5	5	5
6	xxx	Female	2	5	5	5	5
7	xxx	Female	3	5	4	4	4
8	xxx	Female	3	4	4	5	5
9	xxx	Female	3	4	4	4	4
10	xxx	Female	4	4	5	4	4
11	xxx	Female	4	4	5	4	4
12	xxx	Male	4	5	5	5	5
13	xxx	Male	5	5	5	5	5
14	xxx	Male	5	4	4	4	5
15	xxx	Male	5	5	4	4	5
16	xxx	Female	6	4	4	3	3
17	xxx	Male	6	4	5	4	5
18	xxx	Female	6	4	5	4	4
19	xxx	Male	7	5	5	5	5
20	xxx	Female	7	4	5	4	4
21	xxx	Female	7	5	5	5	5
22	xxx	Female	8	4	4	4	4
23	xxx	Female	8	5	5	5	5
24	xxx	Female	8	3	4	4	4
